# Supplementary material for: Anion-templated nanosized silver clusters protected by mixed thiolate and diphosphine
Source: Royal Society of Chemistry journal article supplement (doi:10.1039/c6nr09632h), 2017-01-01
Supplement: c6nr09632h1.pdf [file c6nr09632h1.pdf]

## Electronic Supplementary Information (ESI)

# Anion-Templated Nanosized Silver Clusters Protected by Mixed Thiolate and Diphosphine

Xiao-Yu Li,<sup>a,‡</sup> Zhi Wang,<sup>a,‡</sup> Hai-Feng Su,<sup>b,‡</sup> Sheng Feng,<sup>a</sup> Mohamedally Kurmoo,<sup>c</sup> Chen-Ho Tung,<sup>a</sup> Di Sun,<sup>\*a</sup> and Lan-Sun Zheng<sup>b</sup>

<sup>a</sup>Key Lab of Colloid and Interface Chemistry, Ministry of Education, School of Chemistry and Chemical Engineering, Shandong University, Jinan, 250100, P. R. China. E-mail: dsun@sdu.edu.cn.

<sup>b</sup>Department of Chemistry, College of Chemistry and Chemical Engineering, Xiamen University, Xiamen 361005, People's Republic of China.

<sup>c</sup>Institut de Chimie de Strasbourg, Université de Strasbourg, CNRS-UMR 7177, 4 rue Blaise Pascal, 67008 Strasbourg Cedex, France.

<sup>‡</sup>These authors contributed equally.

## Experiment details

The precursors,  $\{(\text{HNEt}_3)_2[\text{Ag}_{10}(\text{SC}_6\text{H}_4\text{tBu})_{12}]\}_n$  and  $[\text{MeC}_6\text{H}_4\text{SAg}]_n$  were prepared by slight modifications to those in the literature.<sup>1</sup> All chemicals and solvents used in the syntheses were of analytical grade and used without further purification.  $\text{AgCF}_3\text{SO}_3$  and  $\text{AgBF}_4$  was purchased from Nanjing luxury Catalytic materials Co., Ltd. IR spectra were recorded on a PerkinElmer Spectrum Two in the frequency range of 4000-400  $\text{cm}^{-1}$ . The diffuse-reflectance spectra were performed on UV-Vis spectrophotometer (Evolution 220, ISA-220 accessory, Thermo Scientific) using a built-in 10 mm silicon photodiode with a 60 mm Spectralon sphere. The excitation spectra were recorded on Lumina Fluorescence Spectrometer (Thermo Fisher). Temperature-dependent photoluminescence measurements were carried out in an Edinburgh spectrofluorimeter (F920S) coupled with an Optistat DN cryostat (Oxford Instruments), and the ITC temperature controller and a pressure gauge were used to realize the variable temperature measurement in the range of 88-298 K. Spectra were collected at different temperatures after a 3 min homoiothermy. Time-resolved photoluminescence lifetime and the quantum yield measurements were measured on the same instrument. The high-resolution electrospray mass spectrometry was performed on an Agilent (Santa Clara, CA, USA) ESI-TOF mass spectrometer (6224). The instrument was calibrated with an Agilent tune mixture before mass analysis. The data analyses of mass spectra were processed on a Bruker DataAnalysis (Version 4.0) software and the simulations were performed on a Bruker Isotope Pattern software.

## X-ray Crystallography

Single crystals of **1-6** with appropriate dimensions were chosen under an optical microscope and quickly coated with high vacuum grease (Dow Corning Corporation) before being mounted on a glass fiber for data collection. Single-crystal X-ray diffraction data were collected using a Bruker SMART APEX II diffractometer with a CCD area detector (graphite monochromatic Mo K $\alpha$  radiation,  $\lambda = 0.71073 \text{ \AA}$ ,  $\omega$ -scans with a  $0.5^\circ$  step in  $\omega$ ) for **1-6**. Indexing was performed using APEX2 (Difference Vectors method).<sup>2</sup> Data integration and reduction were performed using Saint Plus 6.01.<sup>3</sup> Absorption correction was performed by multi-scan method implemented in SADABS.<sup>4</sup> Space groups were determined using XPREP implemented in APEX2. Structures of **1-6** were solved using SHELXS-97 (direct methods) and refined using SHELXL-97 (full-matrix least-squares on  $F^2$ ).<sup>5</sup> Hydrogen atoms were placed in calculated positions and included as riding atoms with isotropic displacement parameters 1.2-1.5 times  $U_{\text{eq}}$  of the attached C atoms. Furthermore, it was necessary to use constraints to control the geometry of the aromatic rings and restraints to enforce chemically sensible bond lengths and angles in the <sup>t</sup>Bu- groups. Vibrational restraints were also used to control atomic displacement parameters of various atoms. All structures were examined using the Addsym subroutine of PLATON<sup>6</sup> to assure that no additional symmetry could be applied to the models. Pertinent crystallographic data collection and refinement parameters of **1-6** are collated in Table S2. Selected bond lengths and angles are collated in Table S3.

### Synthesis of [S@Ag<sub>18</sub>(<sup>t</sup>BuC<sub>6</sub>H<sub>4</sub>S)<sub>16</sub>(dppp)<sub>4</sub>]·DMF·5CH<sub>3</sub>CN·3CH<sub>3</sub>OH (1)

{(HNEt<sub>3</sub>)<sub>2</sub>[Ag<sub>10</sub>(SC<sub>6</sub>H<sub>4</sub><sup>t</sup>Bu)<sub>12</sub>]}<sub>n</sub> (54.8 mg, 0.20 mmol), dppp (41.2 mg, 0.10 mmol) and K<sub>2</sub>Cr<sub>2</sub>O<sub>7</sub> (5.8 mg, 0.02 mmol) were added into 5 mL CH<sub>3</sub>OH-CH<sub>3</sub>CN-DMF (v:v:v = 6:4:1) and treated under the ultrasonic condition for 10 min (160 W, 40 kHz, 25 °C). To this solution CF<sub>3</sub>SO<sub>3</sub>Ag (12.8 mg, 0.05 mmol) was added. The reaction continued for further 20 min under the same ultrasonic condition. Then, the reaction mixture was sealed in a 25 mL Teflon-lined reaction vessel and kept at 70 °C for 33 hours. After cooling to room temperature, the solution was filtered and the filtrate was evaporated slowly in darkness at room temperature. The product **1** crystallized as yellow rod crystals for two weeks, which were isolated by filtration, washed with ethanol and dried at room temperature (Yield: 60%).

### Synthesis of [MoO<sub>4</sub>@Ag<sub>24</sub>(MeC<sub>6</sub>H<sub>4</sub>S)<sub>12</sub>(dppm)<sub>6</sub>(MoO<sub>4</sub>)<sub>4</sub>]·2BF<sub>4</sub>·C<sub>2</sub>H<sub>5</sub>NO (2)

[MeC<sub>6</sub>H<sub>4</sub>SAg]<sub>n</sub> (23.1 mg, 0.10 mmol), dppm (19.2 mg, 0.05 mmol) and (NH<sub>4</sub>)<sub>6</sub>Mo<sub>7</sub>O<sub>24</sub>·4H<sub>2</sub>O (6.2 mg, 0.005 mmol) were added into 5 mL CH<sub>3</sub>OH-CH<sub>3</sub>CN (v:v = 3:2) and treated under the ultrasonic condition for 10 min (160 W, 40 kHz, 25 °C). To this solution AgBF<sub>4</sub> (19.6 mg, 0.10 mmol) was added. The reaction continued for further 20 min under the same ultrasonic condition. Then, the reaction mixture was sealed in a 25 mL Teflon-lined reaction vessel and kept at 75 °C for 33 hours. After cooling to room temperature, the solution was filtered and the filtrate was evaporated slowly in darkness at room temperature. The product **2** crystallized as yellow hexagon crystals were collected after ten days (Yield: ~15 %).

### Synthesis of [MoO<sub>4</sub>@Ag<sub>24</sub>(MeC<sub>6</sub>H<sub>4</sub>S)<sub>12</sub>(dppm)<sub>6</sub>(MoO<sub>4</sub>)<sub>4</sub>]·2CF<sub>3</sub>SO<sub>3</sub> (3)

The synthesis of complex **3** was similar to that of **2** except for using (<sup>n</sup>Bu<sub>4</sub>N)<sub>4</sub>Mo<sub>8</sub>O<sub>26</sub> (8.7 mg, 0.004 mmol) and CF<sub>3</sub>SO<sub>3</sub>Ag (25.7 mg, 0.10 mmol) instead of (NH<sub>4</sub>)<sub>6</sub>Mo<sub>7</sub>O<sub>24</sub>·4H<sub>2</sub>O and AgBF<sub>4</sub>. The product **3** crystallized as yellow hexagon crystals for one week (Yield: ~10 %).

#### **Synthesis of [MoO<sub>4</sub>@Ag<sub>24</sub>(MeC<sub>6</sub>H<sub>4</sub>S)<sub>12</sub>(dppf)<sub>6</sub>(MoO<sub>4</sub>)<sub>4</sub>]·2CF<sub>3</sub>SO<sub>3</sub> (4)**

The synthesis of complex **4** was similar to that of **2** except for using dppf (27.7 mg, 0.05 mmol), Na<sub>2</sub>MoO<sub>4</sub> (2.4 mg, 0.01 mmol) and CF<sub>3</sub>SO<sub>3</sub>Ag (25.7 mg, 0.10 mmol) instead of dppm, (NH<sub>4</sub>)<sub>6</sub>Mo<sub>7</sub>O<sub>24</sub>·4H<sub>2</sub>O and AgBF<sub>4</sub>. Additionally, the reaction mixture was kept at 70 °C instead of 75 °C for 33 hours. The product **4** crystallized as yellow block crystals for two weeks (Yield: 30%)

#### **Synthesis of [MoO<sub>4</sub>@Ag<sub>24</sub>(MeC<sub>6</sub>H<sub>4</sub>S)<sub>12</sub>(dppb)<sub>6</sub>(MoO<sub>4</sub>)<sub>4</sub>]·2CF<sub>3</sub>SO<sub>3</sub> (5)**

The synthesis of complex **5** was similar to that of **2** except for using dppb (21.3 mg, 0.05 mmol), (<sup>n</sup>Bu<sub>4</sub>N)<sub>4</sub>Mo<sub>8</sub>O<sub>26</sub> (6.5 mg, 0.003 mmol) and CF<sub>3</sub>SO<sub>3</sub>Ag (25.7 mg, 0.10 mmol) instead of dppm, (NH<sub>4</sub>)<sub>6</sub>Mo<sub>7</sub>O<sub>24</sub>·4H<sub>2</sub>O and AgBF<sub>4</sub>. Additionally, the reaction mixture was kept at 70 °C instead of 75 °C for 33 hours. The product **5** crystallized as yellow block crystals for three weeks, which were isolated by filtration, washed with ethanol and dried at room temperature (Yield: 50%).

#### **Synthesis of [Mo<sub>6</sub>O<sub>22</sub>@Ag<sub>46</sub>(<sup>n</sup>BuC<sub>6</sub>H<sub>4</sub>S)<sub>32</sub>(dppm)<sub>4</sub>(CH<sub>3</sub>CN)<sub>8</sub>]·6CF<sub>3</sub>SO<sub>3</sub> (6)**

The synthesis of complex **6** was similar to that of **1** except for using dppm (19.2 mg, 0.05 mmol) and (<sup>n</sup>Bu<sub>4</sub>N)<sub>2</sub>Mo<sub>6</sub>O<sub>19</sub> (4.1 mg, 0.003 mmol) instead of dppp and K<sub>2</sub>Cr<sub>2</sub>O<sub>7</sub>. Particularly, the reaction solution system was C<sub>2</sub>H<sub>5</sub>OH-CH<sub>3</sub>CN (5 mL, v:v = 3:2) instead of CH<sub>3</sub>OH-CH<sub>3</sub>CN (5 mL, v:v = 3:2). The product **6** crystallized as yellow rectangular crystals for one month (Yield: ~10 %), which were isolated by filtration, washed with ethanol and dried at room temperature.

**Table S1. The geometry and coordination mode of  $\text{Mo}_6\text{O}_{22}^{8-}$  polyoxoanion templates found in the Ag clusters in the literature and this work.**

| Structures of $\text{Mo}_6\text{O}_{22}^{8-}$ in silver clusters                                                                                                                                                                      | Numbers of Ag ligated by POM | Reference |
|---------------------------------------------------------------------------------------------------------------------------------------------------------------------------------------------------------------------------------------|------------------------------|-----------|
| $\text{Mo}_6\text{O}_{22}@\text{Ag}_{58}\text{S}_2(\text{SC}_6\text{H}_4^t\text{Bu})_{36}(\text{CF}_3\text{COO})_{10}(\text{H}_2\text{O})_8$         | 24                           | [7]       |
| $\text{Mo}_6\text{O}_{22}@\text{Ag}_{40}(\text{C}\equiv\text{C}^t\text{Bu})_{20}(\text{CF}_3\text{COO})_{12}$                                       | 24                           | [8]       |
| $[(\text{Mo}_6\text{O}_{22})_2@\text{Ag}_{60}(\text{C}\equiv\text{C}^t\text{Bu})_{38}](\text{CF}_3\text{SO}_3)_6$                                  | 22                           | [9]       |
| $[\text{Mo}_6\text{O}_{22}@\text{Ag}_{46}(\text{BuC}_6\text{H}_4\text{S})_{32}(\text{dppm})_4(\text{CH}_3\text{CN})_8](\text{CF}_3\text{SO}_3)_6$  | 28                           | This work |

**Table S2. Crystal data for 1-6.**

| Compound                               | 1                                                                                                               | 2                                                                                                                                                               | 3                                                                                                                                 | 4                                                                                                                                   | 5                                                                                                                  | 6                                                                                                                                               |
|----------------------------------------|-----------------------------------------------------------------------------------------------------------------|-----------------------------------------------------------------------------------------------------------------------------------------------------------------|-----------------------------------------------------------------------------------------------------------------------------------|-------------------------------------------------------------------------------------------------------------------------------------|--------------------------------------------------------------------------------------------------------------------|-------------------------------------------------------------------------------------------------------------------------------------------------|
| Empirical formula                      | C <sub>283</sub> H <sub>343</sub> Ag <sub>18</sub> N <sub>6</sub> O <sub>3</sub> P <sub>8</sub> S <sub>17</sub> | C <sub>240</sub> H <sub>231</sub> Ag <sub>24</sub> B <sub>2</sub> F <sub>8</sub> Mo <sub>5</sub> N <sub>3</sub> O <sub>23</sub> P <sub>12</sub> S <sub>12</sub> | C <sub>236</sub> H <sub>216</sub> Ag <sub>24</sub> F <sub>6</sub> Mo <sub>5</sub> O <sub>26</sub> P <sub>12</sub> S <sub>14</sub> | C <sub>290</sub> H <sub>255</sub> Ag <sub>24</sub> Fe <sub>6</sub> Mo <sub>5</sub> NO <sub>20</sub> P <sub>12</sub> S <sub>12</sub> | C <sub>252</sub> H <sub>252</sub> Ag <sub>24</sub> Mo <sub>5</sub> O <sub>20</sub> P <sub>12</sub> S <sub>12</sub> | C <sub>438</sub> H <sub>522</sub> Ag <sub>46</sub> F <sub>6</sub> Mo <sub>6</sub> N <sub>8</sub> O <sub>28</sub> P <sub>8</sub> S <sub>34</sub> |
| Formula weight                         | 6611.05                                                                                                         | 7523.84                                                                                                                                                         | 7471.15                                                                                                                           | 8233.99                                                                                                                             | 7425.48                                                                                                            | 13336.06                                                                                                                                        |
| Temperature/K                          | 173(2)                                                                                                          | 100(2)                                                                                                                                                          | 100(2)                                                                                                                            | 100(2)                                                                                                                              | 173(2)                                                                                                             | 173(2)                                                                                                                                          |
| Crystal system                         | triclinic                                                                                                       | trigonal                                                                                                                                                        | trigonal                                                                                                                          | triclinic                                                                                                                           | cubic                                                                                                              | triclinic                                                                                                                                       |
| Space group                            | $P\bar{1}$                                                                                                      | $R\bar{3}$                                                                                                                                                      | $R\bar{3}$                                                                                                                        | $P\bar{1}$                                                                                                                          | $Pn\bar{3}$                                                                                                        | $P\bar{1}$                                                                                                                                      |
| a/Å                                    | 21.510(4)                                                                                                       | 21.9874(6)                                                                                                                                                      | 22.0680(14)                                                                                                                       | 22.7887(18)                                                                                                                         | 24.9678(11)                                                                                                        | 26.730(8)                                                                                                                                       |
| b/Å                                    | 26.990(5)                                                                                                       | 21.9874(6)                                                                                                                                                      | 22.0680(14)                                                                                                                       | 27.962(2)                                                                                                                           | 24.9678(11)                                                                                                        | 26.938(8)                                                                                                                                       |
| c/Å                                    | 34.102(6)                                                                                                       | 93.887(5)                                                                                                                                                       | 94.137(6)                                                                                                                         | 33.377(3)                                                                                                                           | 24.9678(11)                                                                                                        | 27.226(8)                                                                                                                                       |
| $\alpha$ /°                            | 69.368(2)                                                                                                       | 90.00                                                                                                                                                           | 90.00                                                                                                                             | 69.6918(7)                                                                                                                          | 90.00                                                                                                              | 107.058(3)                                                                                                                                      |
| $\beta$ /°                             | 72.781(2)                                                                                                       | 90.00                                                                                                                                                           | 90.00                                                                                                                             | 88.7509(8)                                                                                                                          | 90.00                                                                                                              | 105.040(3)                                                                                                                                      |
| $\gamma$ /°                            | 66.700(2)                                                                                                       | 120.00                                                                                                                                                          | 120.00                                                                                                                            | 84.3460(8)                                                                                                                          | 90.00                                                                                                              | 112.696(3)                                                                                                                                      |
| Volume/Å <sup>3</sup>                  | 16732(5)                                                                                                        | 39308(3)                                                                                                                                                        | 39703(4)                                                                                                                          | 19848(3)                                                                                                                            | 15564.7(12)                                                                                                        | 15671(8)                                                                                                                                        |
| Z                                      | 2                                                                                                               | 6                                                                                                                                                               | 6                                                                                                                                 | 2                                                                                                                                   | 2                                                                                                                  | 1                                                                                                                                               |
| $\rho_{\text{calc}}$ g/cm <sup>3</sup> | 1.312                                                                                                           | 1.907                                                                                                                                                           | 1.875                                                                                                                             | 1.378                                                                                                                               | 1.584                                                                                                              | 1.413                                                                                                                                           |
| $\mu$ /mm <sup>-1</sup>                | 1.215                                                                                                           | 2.208                                                                                                                                                           | 2.201                                                                                                                             | 1.669                                                                                                                               | 1.854                                                                                                              | 1.691                                                                                                                                           |
| F(000)                                 | 6690.0                                                                                                          | 22008.0                                                                                                                                                         | 21816.0                                                                                                                           | 8056.0                                                                                                                              | 7268.0                                                                                                             | 6562.0                                                                                                                                          |
| Radiation                              | MoK $\alpha$                                                                                                    | MoK $\alpha$                                                                                                                                                    | MoK $\alpha$                                                                                                                      | MoK $\alpha$                                                                                                                        | MoK $\alpha$                                                                                                       | MoK $\alpha$                                                                                                                                    |
| Reflections collected                  | 144730                                                                                                          | 38707                                                                                                                                                           | 31359                                                                                                                             | 97197                                                                                                                               | 34650                                                                                                              | 130324                                                                                                                                          |
| Independent reflections                | 57254                                                                                                           | 15276                                                                                                                                                           | 15426                                                                                                                             | 68124                                                                                                                               | 5998                                                                                                               | 53916                                                                                                                                           |
| Data/parameters                        | 57254/29<br>29                                                                                                  | 15276/993                                                                                                                                                       | 15426/962                                                                                                                         | 68124/3337                                                                                                                          | 5998/255                                                                                                           | 53916/2440                                                                                                                                      |
| GOF                                    | 0.920                                                                                                           | 1.013                                                                                                                                                           | 1.090                                                                                                                             | 0.973                                                                                                                               | 1.091                                                                                                              | 0.885                                                                                                                                           |
| Final R indexes [I>2 $\sigma$ (I)]     | R <sub>1</sub> = 0.0716,<br>wR <sub>2</sub> = 0.1636                                                            | R <sub>1</sub> = 0.0332,<br>wR <sub>2</sub> = 0.0784                                                                                                            | R <sub>1</sub> = 0.0746,<br>wR <sub>2</sub> = 0.1563                                                                              | R <sub>1</sub> = 0.0701,<br>wR <sub>2</sub> = 0.1806                                                                                | R <sub>1</sub> = 0.0369,<br>wR <sub>2</sub> = 0.0908                                                               | R <sub>1</sub> = 0.0992,<br>wR <sub>2</sub> = 0.2292                                                                                            |
| Final R indexes [all data]             | R <sub>1</sub> = 0.1431,<br>wR <sub>2</sub> = 0.1866                                                            | R <sub>1</sub> = 0.0488,<br>wR <sub>2</sub> = 0.0874                                                                                                            | R <sub>1</sub> = 0.0893,<br>wR <sub>2</sub> = 0.1621                                                                              | R <sub>1</sub> = 0.1181,<br>wR <sub>2</sub> = 0.2048                                                                                | R <sub>1</sub> = 0.0519,<br>wR <sub>2</sub> = 0.0975                                                               | R <sub>1</sub> = 0.1912,<br>wR <sub>2</sub> = 0.2685                                                                                            |

**Table S3: Selected bond distances (Å) and angles (°) for 1-6**

| Compound 1 |             |              |             |
|------------|-------------|--------------|-------------|
| Ag1—Ag3    | 2.9188 (11) | Ag10—S6      | 2.412 (2)   |
| Ag1—P1     | 2.407 (3)   | Ag10—S13     | 2.419 (3)   |
| Ag1—S1     | 2.494 (3)   | Ag10—S16     | 2.658 (2)   |
| Ag1—S2     | 2.495 (3)   | Ag11—Ag13    | 3.3416 (11) |
| Ag2—Ag3    | 3.1289 (11) | Ag11—S9      | 2.459 (3)   |
| Ag2—S2     | 2.430 (3)   | Ag11—S12     | 2.652 (3)   |
| Ag2—S3     | 2.639 (2)   | Ag11—S15     | 2.612 (2)   |
| Ag2—S6     | 2.462 (3)   | Ag11—S16     | 2.675 (2)   |
| Ag3—Ag4    | 3.0486 (12) | Ag12—Ag13    | 3.1009 (12) |
| Ag3—S1     | 2.453 (3)   | Ag12—S8      | 2.651 (3)   |
| Ag3—S5     | 2.427 (3)   | Ag12—S11     | 2.436 (3)   |
| Ag4—P8     | 2.412 (3)   | Ag12—S13     | 2.461 (3)   |
| Ag4—S1     | 2.965 (3)   | Ag13—Ag14    | 2.9541 (11) |
| Ag4—S3     | 2.577 (2)   | Ag13—Ag15    | 3.0525 (12) |
| Ag4—S4     | 2.564 (3)   | Ag13—S8      | 2.937 (2)   |
| Ag5—Ag6    | 3.0635 (12) | Ag13—S10     | 2.452 (3)   |
| Ag5—S4     | 2.904 (3)   | Ag13—S12     | 2.399 (3)   |
| Ag5—S5     | 2.483 (3)   | Ag14—P5      | 2.407 (3)   |
| Ag5—S16    | 2.840 (2)   | Ag14—S10     | 2.517 (3)   |
| Ag5—S17    | 2.411 (3)   | Ag14—S11     | 2.475 (3)   |
| Ag6—Ag7    | 3.1151 (11) | Ag15—P4      | 2.446 (3)   |
| Ag6—Ag8    | 3.0689 (12) | Ag15—S8      | 2.768 (3)   |
| Ag6—S4     | 2.392 (3)   | Ag15—S9      | 2.560 (2)   |
| Ag6—S15    | 2.421 (3)   | Ag15—S10     | 2.774 (3)   |
| Ag7—S3     | 2.446 (2)   | Ag16—Ag17    | 3.2933 (12) |
| Ag7—S14    | 2.424 (2)   | Ag16—S7      | 2.411 (3)   |
| Ag7—S16    | 2.769 (3)   | Ag16—S8      | 2.436 (3)   |
| Ag8—P7     | 2.389 (3)   | Ag16—S16     | 2.803 (2)   |
| Ag8—S14    | 2.538 (2)   | Ag17—P3      | 2.440 (3)   |
| Ag8—S15    | 2.459 (3)   | Ag17—S7      | 2.768 (3)   |
| Ag9—P6     | 2.425 (3)   | Ag17—S9      | 2.793 (3)   |
| Ag9—S12    | 2.624 (3)   | Ag17—S17     | 2.505 (3)   |
| Ag9—S13    | 2.653 (2)   | Ag18—P2      | 2.429 (3)   |
| Ag9—S14    | 2.656 (2)   | Ag18—S5      | 2.630 (3)   |
| Ag10—Ag12  | 3.1858 (12) | Ag18—S6      | 2.614 (3)   |
| Ag10—Ag16  | 3.3100 (13) | Ag18—S7      | 2.643 (3)   |
| P1—Ag1—S1  | 135.90 (9)  | S9—Ag11—S15  | 134.56 (8)  |
| P1—Ag1—S2  | 117.58 (9)  | S9—Ag11—S16  | 107.75 (8)  |
| S1—Ag1—S2  | 106.37 (8)  | S12—Ag11—S16 | 102.29 (8)  |



|                      |             |                       |             |
|----------------------|-------------|-----------------------|-------------|
| S2—Ag2—S3            | 103.61 (8)  | S15—Ag11—S12          | 92.81 (8)   |
| S2—Ag2—S6            | 140.95 (8)  | S15—Ag11—S16          | 96.90 (8)   |
| S6—Ag2—S3            | 114.32 (8)  | S11—Ag12—S8           | 101.48 (9)  |
| S5—Ag3—S1            | 159.54 (9)  | S11—Ag12—S13          | 138.78 (9)  |
| P8—Ag4—S1            | 102.64 (9)  | S13—Ag12—S8           | 118.54 (8)  |
| P8—Ag4—S3            | 134.16 (10) | S10—Ag13—S8           | 93.30 (8)   |
| P8—Ag4—S4            | 126.82 (9)  | S12—Ag13—S8           | 108.25 (8)  |
| S3—Ag4—S1            | 90.97 (7)   | S12—Ag13—S10          | 158.10 (9)  |
| S4—Ag4—S1            | 102.02 (8)  | P5—Ag14—S10           | 125.49 (9)  |
| S4—Ag4—S3            | 91.38 (8)   | P5—Ag14—S11           | 121.42 (9)  |
| S5—Ag5—S4            | 89.93 (8)   | S11—Ag14—S10          | 113.09 (9)  |
| S5—Ag5—S16           | 101.47 (8)  | P4—Ag15—S8            | 129.19 (9)  |
| S16—Ag5—S4           | 90.88 (7)   | P4—Ag15—S9            | 123.04 (9)  |
| S17—Ag5—S4           | 111.83 (8)  | P4—Ag15—S10           | 105.36 (9)  |
| S17—Ag5—S5           | 154.73 (10) | S8—Ag15—S10           | 90.41 (8)   |
| S17—Ag5—S16          | 91.25 (8)   | S9—Ag15—S8            | 87.06 (8)   |
| S4—Ag6—S15           | 166.51 (8)  | S9—Ag15—S10           | 118.15 (8)  |
| S3—Ag7—S16           | 95.05 (8)   | S7—Ag16—S8            | 151.05 (9)  |
| S14—Ag7—S3           | 147.96 (9)  | S7—Ag16—S16           | 109.00 (8)  |
| S14—Ag7—S16          | 116.58 (8)  | S8—Ag16—S16           | 99.95 (8)   |
| P7—Ag8—S14           | 118.67 (9)  | P3—Ag17—S7            | 100.02 (10) |
| P7—Ag8—S15           | 138.75 (9)  | P3—Ag17—S9            | 117.92 (10) |
| S15—Ag8—S14          | 102.43 (8)  | P3—Ag17—S17           | 130.03 (10) |
| P6—Ag9—S12           | 127.74 (8)  | S7—Ag17—S9            | 110.51 (8)  |
| P6—Ag9—S13           | 122.58 (8)  | S17—Ag17—S7           | 110.08 (9)  |
| P6—Ag9—S14           | 118.81 (8)  | S17—Ag17—S9           | 87.96 (8)   |
| S12—Ag9—S13          | 93.59 (8)   | P2—Ag18—S5            | 118.37 (9)  |
| S12—Ag9—S14          | 91.93 (8)   | P2—Ag18—S6            | 123.04 (9)  |
| S13—Ag9—S14          | 93.43 (7)   | P2—Ag18—S7            | 117.22 (9)  |
| S6—Ag10—S13          | 158.45 (9)  | S5—Ag18—S7            | 90.78 (8)   |
| S6—Ag10—S16          | 97.47 (8)   | S6—Ag18—S5            | 97.33 (8)   |
| S13—Ag10—S16         | 100.91 (8)  | S6—Ag18—S7            | 104.00 (8)  |
| S9—Ag11—S12          | 117.32 (8)  |                       |             |
| Compound 2           |             |                       |             |
| Ag1—Ag2              | 3.1781 (6)  | Ag4—S3                | 2.4912 (13) |
| Ag1—Ag3              | 3.2901 (5)  | Ag5—Ag2 <sup>ii</sup> | 3.3313 (6)  |
| Ag1—O2               | 2.376 (3)   | Ag5—O5 <sup>ii</sup>  | 2.450 (4)   |
| Ag1—P2               | 2.3872 (13) | Ag5—S2                | 2.4382 (13) |
| Ag1—S3               | 2.7212 (13) | Ag5—S4 <sup>ii</sup>  | 2.4460 (13) |
| Ag1—S4               | 2.5910 (13) | Ag6—Ag7               | 3.0819 (6)  |
| Ag2—Ag5 <sup>i</sup> | 3.3313 (6)  | Ag6—O8 <sup>ii</sup>  | 2.348 (4)   |
| Ag2—O5               | 2.312 (3)   | Ag6—P4                | 2.4020 (15) |
| Ag2—P1               | 2.3850 (14) | Ag6—S1                | 2.7124 (15) |

|                                                               |             |                                        |             |
|---------------------------------------------------------------|-------------|----------------------------------------|-------------|
| Ag2—S3                                                        | 2.5760 (14) | Ag6—S2                                 | 2.6276 (13) |
| Ag2—S4                                                        | 2.9612 (13) | Ag7—O7                                 | 2.298 (4)   |
| Ag3—Ag4                                                       | 3.0313 (6)  | Ag7—P3                                 | 2.3790 (16) |
| Ag3—Ag5                                                       | 3.0783 (6)  | Ag7—S1                                 | 2.5508 (15) |
| Ag3—O2                                                        | 2.496 (4)   | Ag7—S2                                 | 2.9320 (14) |
| Ag3—O3                                                        | 2.597 (2)   | Ag8—Ag8 <sup>ii</sup>                  | 3.1056 (7)  |
| Ag3—S3                                                        | 2.4833 (13) | Ag8—Ag8 <sup>i</sup>                   | 3.1056 (7)  |
| Ag3—S4 <sup>ii</sup>                                          | 2.4681 (14) | Ag8—O4 <sup>ii</sup>                   | 2.521 (3)   |
| Ag4—Ag5                                                       | 3.1946 (6)  | Ag8—O8                                 | 2.460 (4)   |
| Ag4—O4 <sup>ii</sup>                                          | 2.501 (3)   | Ag8—S1                                 | 2.4831 (15) |
| Ag4—O7                                                        | 2.431 (4)   | Ag8—S1 <sup>i</sup>                    | 2.5093 (15) |
| Ag4—S2                                                        | 2.4735 (14) |                                        |             |
| O2—Ag1—P2                                                     | 134.34 (9)  | S3—Ag4—O4 <sup>ii</sup>                | 104.58 (8)  |
| O2—Ag1—S3                                                     | 96.71 (9)   | S2—Ag5—O5 <sup>ii</sup>                | 105.21 (9)  |
| O2—Ag1—S4                                                     | 90.48 (9)   | S2—Ag5—S4 <sup>ii</sup>                | 141.66 (5)  |
| P2—Ag1—S3                                                     | 123.09 (4)  | S4 <sup>ii</sup> —Ag5—O5 <sup>ii</sup> | 103.28 (9)  |
| P2—Ag1—S4                                                     | 113.84 (5)  | O8 <sup>ii</sup> —Ag6—P4               | 134.82 (10) |
| S4—Ag1—S3                                                     | 82.91 (4)   | O8 <sup>ii</sup> —Ag6—S1               | 93.10 (10)  |
| O5—Ag2—P1                                                     | 134.87 (10) | O8 <sup>ii</sup> —Ag6—S2               | 89.31 (9)   |
| O5—Ag2—S3                                                     | 93.01 (10)  | P4—Ag6—S1                              | 127.80 (5)  |
| O5—Ag2—S4                                                     | 92.60 (9)   | P4—Ag6—S2                              | 111.10 (5)  |
| P1—Ag2—S3                                                     | 130.42 (5)  | S2—Ag6—S1                              | 83.53 (4)   |
| P1—Ag2—S4                                                     | 106.02 (4)  | O7—Ag7—P3                              | 130.59 (10) |
| S3—Ag2—S4                                                     | 78.55 (4)   | O7—Ag7—S1                              | 97.45 (10)  |
| O2—Ag3—O3                                                     | 88.48 (14)  | O7—Ag7—S2                              | 89.62 (10)  |
| S3—Ag3—O2                                                     | 100.05 (8)  | P3—Ag7—S1                              | 129.73 (5)  |
| S3—Ag3—O3                                                     | 114.85 (6)  | P3—Ag7—S2                              | 109.44 (5)  |
| S4 <sup>ii</sup> —Ag3—O2                                      | 100.61 (8)  | S1—Ag7—S2                              | 80.58 (4)   |
| S4 <sup>ii</sup> —Ag3—O3                                      | 99.37 (3)   | O8—Ag8—O4 <sup>ii</sup>                | 89.00 (11)  |
| S4 <sup>ii</sup> —Ag3—S3                                      | 140.18 (5)  | O8—Ag8—S1                              | 109.43 (9)  |
| O7—Ag4—O4 <sup>ii</sup>                                       | 90.08 (12)  | O8—Ag8—S1 <sup>i</sup>                 | 95.64 (9)   |
| O7—Ag4—S2                                                     | 98.41 (9)   | S1—Ag8—O4 <sup>ii</sup>                | 106.11 (9)  |
| O7—Ag4—S3                                                     | 104.52 (9)  | S1 <sup>i</sup> —Ag8—O4 <sup>ii</sup>  | 114.12 (9)  |
| S2—Ag4—O4 <sup>ii</sup>                                       | 115.18 (8)  | S1—Ag8—S1 <sup>i</sup>                 | 132.60 (7)  |
| S2—Ag4—S3                                                     | 133.68 (5)  |                                        |             |
| symmetry codes: (i) $-x+y, -x+1, z$ ; (ii) $-y+1, x-y+1, z$ . |             |                                        |             |
| Compound 3                                                    |             |                                        |             |
| Ag1—Ag1 <sup>i</sup>                                          | 3.0920 (17) | Ag4—S6 <sup>i</sup>                    | 2.443 (3)   |
| Ag1—Ag1 <sup>ii</sup>                                         | 3.0920 (17) | Ag5—Ag6                                | 2.9993 (12) |
| Ag1—Ag2                                                       | 3.3277 (14) | Ag5—O4 <sup>ii</sup>                   | 2.438 (8)   |
| Ag1—O2                                                        | 2.464 (9)   | Ag5—O6                                 | 2.509 (8)   |
| Ag1—O6 <sup>i</sup>                                           | 2.491 (7)   | Ag5—S4                                 | 2.474 (3)   |
| Ag1—S3                                                        | 2.486 (3)   | Ag5—S5                                 | 2.477 (3)   |

|                                                         |             |                          |             |
|---------------------------------------------------------|-------------|--------------------------|-------------|
| Ag1—S3 <sup>ii</sup>                                    | 2.506 (3)   | Ag6—Ag7                  | 3.3280 (12) |
| Ag2—Ag3                                                 | 3.0920 (15) | Ag6—O8                   | 2.380 (7)   |
| Ag2—O2                                                  | 2.336 (9)   | Ag6—S5                   | 2.504 (3)   |
| Ag2—P4                                                  | 2.396 (4)   | Ag6—S6 <sup>i</sup>      | 2.483 (3)   |
| Ag2—S3 <sup>ii</sup>                                    | 2.729 (3)   | Ag7—Ag8                  | 3.1998 (13) |
| Ag2—S4                                                  | 2.632 (3)   | Ag7—O8                   | 2.292 (7)   |
| Ag3—O4 <sup>ii</sup>                                    | 2.277 (9)   | Ag7—P1                   | 2.375 (3)   |
| Ag3—P3                                                  | 2.379 (4)   | Ag7—S5                   | 2.782 (3)   |
| Ag3—S3 <sup>ii</sup>                                    | 2.544 (3)   | Ag7—S6                   | 2.619 (3)   |
| Ag3—S4                                                  | 2.892 (3)   | Ag8—Ag4 <sup>ii</sup>    | 3.3740 (13) |
| Ag4—Ag5                                                 | 3.2186 (13) | Ag8—O5 <sup>ii</sup>     | 2.361 (8)   |
| Ag4—Ag6                                                 | 3.0524 (12) | Ag8—P2                   | 2.394 (3)   |
| Ag4—Ag8 <sup>i</sup>                                    | 3.3740 (13) | Ag8—S5                   | 2.573 (3)   |
| Ag4—O5                                                  | 2.465 (8)   | Ag8—S6                   | 2.857 (3)   |
| Ag4—S4                                                  | 2.447 (3)   |                          |             |
| O2—Ag1—O6 <sup>i</sup>                                  | 89.4 (3)    | O4 <sup>ii</sup> —Ag5—O6 | 90.1 (3)    |
| O2—Ag1—S3 <sup>ii</sup>                                 | 97.9 (2)    | O4 <sup>ii</sup> —Ag5—S4 | 96.3 (2)    |
| O2—Ag1—S3                                               | 107.2 (2)   | O4 <sup>ii</sup> —Ag5—S5 | 106.7 (2)   |
| O6 <sup>i</sup> —Ag1—S3 <sup>ii</sup>                   | 116.43 (19) | S4—Ag5—O6                | 110.84 (19) |
| S3—Ag1—O6 <sup>i</sup>                                  | 105.30 (19) | S4—Ag5—S5                | 134.21 (11) |
| S3—Ag1—S3 <sup>ii</sup>                                 | 131.15 (15) | S5—Ag5—O6                | 108.18 (18) |
| O2—Ag2—P4                                               | 133.8 (2)   | O8—Ag6—S5                | 98.32 (17)  |
| O2—Ag2—S3 <sup>ii</sup>                                 | 95.1 (2)    | O8—Ag6—S6 <sup>i</sup>   | 102.64 (18) |
| O2—Ag2—S4                                               | 90.2 (2)    | S6 <sup>i</sup> —Ag6—S5  | 141.56 (10) |
| P4—Ag2—S3 <sup>ii</sup>                                 | 126.82 (12) | O8—Ag7—P1                | 140.61 (19) |
| P4—Ag2—S4                                               | 111.24 (12) | O8—Ag7—S5                | 93.01 (19)  |
| S4—Ag2—S3 <sup>ii</sup>                                 | 82.79 (10)  | O8—Ag7—S6                | 90.10 (19)  |
| O4 <sup>ii</sup> —Ag3—P3                                | 130.5 (2)   | P1—Ag7—S5                | 120.19 (10) |
| O4 <sup>ii</sup> —Ag3—S3 <sup>ii</sup>                  | 98.1 (2)    | P1—Ag7—S6                | 113.86 (10) |
| O4 <sup>ii</sup> —Ag3—S4                                | 89.3 (2)    | S6—Ag7—S5                | 81.21 (9)   |
| P3—Ag3—S3 <sup>ii</sup>                                 | 128.78 (12) | O5 <sup>ii</sup> —Ag8—P2 | 134.2 (2)   |
| P3—Ag3—S4                                               | 110.13 (13) | O5 <sup>ii</sup> —Ag8—S5 | 93.3 (2)    |
| S3 <sup>ii</sup> —Ag3—S4                                | 81.15 (10)  | O5 <sup>ii</sup> —Ag8—S6 | 92.1 (2)    |
| S4—Ag4—O5                                               | 106.7 (2)   | P2—Ag8—S5                | 130.18 (11) |
| S6 <sup>i</sup> —Ag4—O5                                 | 100.51 (19) | P2—Ag8—S6                | 106.65 (10) |
| S6 <sup>i</sup> —Ag4—S4                                 | 140.93 (10) | S5—Ag8—S6                | 80.56 (9)   |
| Symmetry codes: (i) $-x+y, -x, z$ ; (ii) $-y, x-y, z$ . |             |                          |             |
| Compound 4                                              |             |                          |             |
| Ag1—Ag2                                                 | 3.1756 (12) | Ag12—O14                 | 2.360 (7)   |
| Ag1—S4                                                  | 2.780 (3)   | Ag13—Ag14                | 3.0232 (11) |
| Ag1—S5                                                  | 2.549 (3)   | Ag13—S1                  | 2.496 (3)   |
| Ag1—P10                                                 | 2.392 (3)   | Ag13—S2                  | 2.496 (3)   |
| Ag1—O12                                                 | 2.375 (7)   | Ag13—O4                  | 2.356 (7)   |

|           |             |           |             |
|-----------|-------------|-----------|-------------|
| Ag2—S4    | 2.547 (3)   | Ag13—O5   | 2.551 (6)   |
| Ag2—S5    | 2.737 (3)   | Ag14—Ag15 | 3.2787 (12) |
| Ag2—P9    | 2.377 (3)   | Ag14—S1   | 2.481 (3)   |
| Ag2—O15   | 2.411 (6)   | Ag14—S7   | 2.480 (3)   |
| Ag3—Ag4   | 3.0179 (11) | Ag14—O6   | 2.552 (6)   |
| Ag3—Ag5   | 2.9886 (10) | Ag14—O19  | 2.400 (6)   |
| Ag3—S5    | 2.496 (3)   | Ag15—Ag16 | 3.1401 (11) |
| Ag3—S8    | 2.521 (3)   | Ag15—S1   | 2.728 (3)   |
| Ag3—O7    | 2.511 (6)   | Ag15—S12  | 2.526 (2)   |
| Ag3—O11   | 2.348 (6)   | Ag15—P3   | 2.376 (3)   |
| Ag4—Ag5   | 3.0108 (11) | Ag15—O19  | 2.392 (7)   |
| Ag4—S5    | 2.525 (3)   | Ag16—S1   | 2.519 (3)   |
| Ag4—S6    | 2.507 (3)   | Ag16—S12  | 2.778 (3)   |
| Ag4—O8    | 2.564 (7)   | Ag16—P4   | 2.365 (3)   |
| Ag4—O15   | 2.393 (7)   | Ag16—O2   | 2.363 (6)   |
| Ag5—S6    | 2.533 (3)   | Ag17—Ag18 | 3.1605 (11) |
| Ag5—S8    | 2.489 (3)   | Ag17—S9   | 2.786 (3)   |
| Ag5—O17   | 2.387 (7)   | Ag17—S10  | 2.562 (3)   |
| Ag6—Ag7   | 3.1178 (12) | Ag17—P5   | 2.389 (3)   |
| Ag6—Ag12  | 3.3153 (12) | Ag17—O3   | 2.373 (7)   |
| Ag6—S6    | 2.503 (3)   | Ag18—S9   | 2.522 (3)   |
| Ag6—S7    | 2.722 (3)   | Ag18—S10  | 2.745 (3)   |
| Ag6—P2    | 2.367 (3)   | Ag18—P6   | 2.384 (3)   |
| Ag6—O14   | 2.411 (6)   | Ag18—O9   | 2.384 (7)   |
| Ag7—S6    | 2.815 (3)   | Ag19—Ag20 | 2.9215 (11) |
| Ag7—S7    | 2.522 (3)   | Ag19—Ag21 | 2.9617 (11) |
| Ag7—P1    | 2.386 (3)   | Ag19—S10  | 2.509 (2)   |
| Ag7—O17   | 2.365 (7)   | Ag19—S12  | 2.545 (2)   |
| Ag8—Ag9   | 3.2778 (11) | Ag19—O2   | 2.328 (6)   |
| Ag8—Ag21  | 3.3655 (11) | Ag20—Ag21 | 3.0670 (10) |
| Ag8—S8    | 2.551 (3)   | Ag20—S10  | 2.517 (3)   |
| Ag8—S11   | 2.718 (3)   | Ag20—S11  | 2.492 (3)   |
| Ag8—P8    | 2.385 (3)   | Ag20—O7   | 2.568 (7)   |
| Ag8—O20   | 2.397 (6)   | Ag20—O9   | 2.371 (6)   |
| Ag9—S8    | 2.905 (3)   | Ag21—S11  | 2.515 (3)   |
| Ag9—S11   | 2.516 (3)   | Ag21—S12  | 2.492 (3)   |
| Ag9—P7    | 2.376 (3)   | Ag21—O6   | 2.550 (6)   |
| Ag9—O11   | 2.367 (7)   | Ag21—O20  | 2.412 (6)   |
| Ag10—Ag11 | 3.2062 (12) | Ag22—Ag23 | 2.9273 (12) |
| Ag10—S2   | 2.514 (3)   | Ag22—Ag24 | 2.9909 (11) |
| Ag10—S3   | 2.773 (3)   | Ag22—S3   | 2.521 (3)   |
| Ag10—P11  | 2.367 (3)   | Ag22—S4   | 2.483 (3)   |
| Ag10—O16  | 2.373 (7)   | Ag22—O16  | 2.345 (7)   |

|             |             |              |             |
|-------------|-------------|--------------|-------------|
| Ag11—S2     | 2.792 (3)   | Ag23—Ag24    | 2.9753 (11) |
| Ag11—S3     | 2.532 (3)   | Ag23—S3      | 2.503 (3)   |
| Ag11—P12    | 2.375 (3)   | Ag23—S9      | 2.520 (2)   |
| Ag11—O4     | 2.364 (6)   | Ag23—O3      | 2.347 (7)   |
| Ag12—Ag13   | 2.9697 (12) | Ag24—S4      | 2.522 (3)   |
| Ag12—Ag14   | 3.0678 (11) | Ag24—S9      | 2.505 (3)   |
| Ag12—S2     | 2.500 (3)   | Ag24—O7      | 2.568 (6)   |
| Ag12—S7     | 2.522 (3)   | Ag24—O12     | 2.351 (6)   |
| Ag12—O8     | 2.574 (6)   |              |             |
| S5—Ag1—S4   | 80.87(8)    | O14—Ag12—S2  | 103.22(17)  |
| P10—Ag1—S4  | 126.09(9)   | O14—Ag12—S7  | 99.80(17)   |
| P10—Ag1—S5  | 140.35(10)  | O14—Ag12—O8  | 86.2(2)     |
| O12—Ag1—S4  | 86.50(16)   | S1—Ag13—S2   | 137.06(9)   |
| O12—Ag1—S5  | 97.90(17)   | S1—Ag13—O5   | 103.67(16)  |
| O12—Ag1—P10 | 110.90(17)  | S2—Ag13—O5   | 115.05(16)  |
| S4—Ag2—S5   | 81.75(9)    | O4—Ag13—S1   | 102.51(17)  |
| P9—Ag2—S4   | 140.84(11)  | O4—Ag13—S2   | 96.66(17)   |
| P9—Ag2—S5   | 126.68(11)  | O4—Ag13—O5   | 88.3(2)     |
| P9—Ag2—O15  | 109.72(19)  | S1—Ag14—O6   | 115.92(15)  |
| O15—Ag2—S4  | 95.20(18)   | S7—Ag14—S1   | 135.42(9)   |
| O15—Ag2—S5  | 89.31(17)   | S7—Ag14—O6   | 102.14(16)  |
| S5—Ag3—S8   | 136.99(9)   | O19—Ag14—S1  | 100.81(17)  |
| S5—Ag3—O7   | 104.56(16)  | O19—Ag14—S7  | 102.19(18)  |
| O7—Ag3—S8   | 113.50(16)  | O19—Ag14—O6  | 89.1(2)     |
| O11—Ag3—S5  | 106.14(18)  | S12—Ag15—S1  | 83.84(8)    |
| O11—Ag3—S8  | 93.78(17)   | P3—Ag15—S1   | 121.37(9)   |
| O11—Ag3—O7  | 89.5(2)     | P3—Ag15—S12  | 143.52(10)  |
| S5—Ag4—O8   | 114.82(15)  | P3—Ag15—O19  | 105.13(17)  |
| S6—Ag4—S5   | 137.73(9)   | O19—Ag15—S1  | 94.33(17)   |
| S6—Ag4—O8   | 102.55(15)  | O19—Ag15—S12 | 97.93(17)   |
| O15—Ag4—S5  | 94.96(16)   | S1—Ag16—S12  | 82.96(8)    |
| O15—Ag4—S6  | 107.10(17)  | P4—Ag16—S1   | 141.35(9)   |
| O15—Ag4—O8  | 86.0(2)     | P4—Ag16—S12  | 123.71(10)  |
| S8—Ag5—S6   | 141.80(9)   | O2—Ag16—S1   | 96.23(17)   |
| O17—Ag5—S6  | 90.61(18)   | O2—Ag16—S12  | 86.58(17)   |
| O17—Ag5—S8  | 108.87(18)  | O2—Ag16—P4   | 111.40(18)  |
| S6—Ag6—S7   | 85.14(9)    | S10—Ag17—S9  | 81.40(8)    |
| P2—Ag6—S6   | 143.93(10)  | P5—Ag17—S9   | 129.36(9)   |
| P2—Ag6—S7   | 120.83(10)  | P5—Ag17—S10  | 137.70(10)  |
| P2—Ag6—O14  | 102.01(19)  | O3—Ag17—S9   | 87.54(17)   |
| O14—Ag6—S6  | 100.83(17)  | O3—Ag17—S10  | 93.75(17)   |
| O14—Ag6—S7  | 93.19(18)   | O3—Ag17—P5   | 113.19(18)  |
| S7—Ag7—S6   | 82.89(8)    | S9—Ag18—S10  | 82.95(8)    |

|                         |             |                          |             |
|-------------------------|-------------|--------------------------|-------------|
| P1—Ag7—S6               | 124.15(10)  | P6—Ag18—S9               | 139.98(9)   |
| P1—Ag7—S7               | 141.04(10)  | P6—Ag18—S10              | 126.24(10)  |
| O17—Ag7—S6              | 84.50(17)   | P6—Ag18—O9               | 109.30(17)  |
| O17—Ag7—S7              | 97.67(18)   | O9—Ag18—S9               | 97.58(18)   |
| O17—Ag7—P1              | 111.22(18)  | O9—Ag18—S10              | 87.21(16)   |
| S8—Ag8—S11              | 82.12(8)    | S10—Ag19—S12             | 143.95(9)   |
| P8—Ag8—S8               | 140.41(10)  | O2—Ag19—S10              | 104.14(16)  |
| P8—Ag8—S11              | 125.51(10)  | O2—Ag19—S12              | 93.00(16)   |
| P8—Ag8—O20              | 108.06(17)  | S10—Ag20—O7              | 114.77(16)  |
| O20—Ag8—S8              | 96.63(18)   | S11—Ag20—S10             | 136.33(9)   |
| O20—Ag8—S11             | 92.97(16)   | S11—Ag20—O7              | 103.75(15)  |
| S11—Ag9—S8              | 79.05(8)    | O9—Ag20—S10              | 92.99(17)   |
| P7—Ag9—S8               | 123.43(9)   | O9—Ag20—S11              | 107.12(17)  |
| P7—Ag9—S11              | 142.73(10)  | O9—Ag20—O7               | 90.2(2)     |
| O11—Ag9—S8              | 84.19(17)   | S11—Ag21—O6              | 116.52(16)  |
| O11—Ag9—S11             | 98.86(18)   | S12—Ag21—S11             | 135.40(9)   |
| O11—Ag9—P7              | 111.74(18)  | S12—Ag21—O6              | 102.49(16)  |
| S2—Ag10—S3              | 83.17(8)    | O20—Ag21—S11             | 97.89(16)   |
| P11—Ag10—S2             | 142.23(10)  | O20—Ag21—S12             | 104.42(16)  |
| P11—Ag10—S3             | 121.68(10)  | O20—Ag21—O6              | 88.2(2)     |
| P11—Ag10—O16            | 111.33(18)  | S4—Ag22—S3               | 142.56(9)   |
| O16—Ag10—S2             | 97.36(17)   | O16—Ag22—S3              | 92.50(17)   |
| O16—Ag10—S3             | 85.86(18)   | O16—Ag22—S4              | 107.10(18)  |
| S3—Ag11—S2              | 82.45(8)    | S3—Ag23—S9               | 137.69(9)   |
| P12—Ag11—S2             | 123.95(9)   | O3—Ag23—S3               | 105.68(18)  |
| P12—Ag11—S3             | 140.54(9)   | O3—Ag23—S9               | 94.72(17)   |
| O4—Ag11—S2              | 88.97(17)   | S4—Ag24—O7               | 112.62(16)  |
| O4—Ag11—S3              | 100.73(17)  | S9—Ag24—S4               | 135.10(9)   |
| O4—Ag11—P12             | 107.78(18)  | S9—Ag24—O7               | 107.42(16)  |
| S2—Ag12—S7              | 137.69(9)   | O12—Ag24—S4              | 93.25(19)   |
| S2—Ag12—O8              | 103.09(16)  | O12—Ag24—S9              | 106.27(18)  |
| S7—Ag12—O8              | 113.50(16)  | O12—Ag24—O7              | 90.2(2)     |
| Compound 5              |             |                          |             |
| Ag1—Ag1 <sup>i</sup>    | 3.3256 (7)  | Ag2—Ag2 <sup>ii</sup>    | 2.9920 (5)  |
| Ag1—S1 <sup>i</sup>     | 2.5272 (10) | Ag2—Ag2 <sup>iii</sup>   | 2.9920 (5)  |
| Ag1—S1                  | 2.7980 (10) | Ag2—S1                   | 2.5110 (10) |
| Ag1—P1                  | 2.3868 (12) | Ag2—S1 <sup>ii</sup>     | 2.4890 (10) |
| Ag1—O2                  | 2.361 (3)   | Ag2—O2                   | 2.359 (3)   |
| S1 <sup>i</sup> —Ag1—S1 | 81.64 (3)   | O2—Ag1—P1                | 109.08 (8)  |
| P1—Ag1—S1 <sup>i</sup>  | 140.71 (4)  | S1 <sup>ii</sup> —Ag2—S1 | 140.27 (4)  |
| P1—Ag1—S1               | 122.05 (4)  | O2—Ag2—S1                | 96.04 (8)   |
| O2—Ag1—S1               | 88.76 (7)   | O2—Ag2—S1 <sup>ii</sup>  | 104.08 (8)  |
| O2—Ag1—S1 <sup>i</sup>  | 101.65 (7)  |                          |             |

| Symmetry codes: (i) $x, -y+1/2, -z+1/2$ ; (ii) $-y+1/2, -z+1/2, x$ ; (iii) $z, -x+1/2, -y+1/2$ . |             |                       |             |
|--------------------------------------------------------------------------------------------------|-------------|-----------------------|-------------|
| Compound 6                                                                                       |             |                       |             |
| Ag1—Ag4                                                                                          | 2.804 (11)  | Ag12—S12              | 2.429 (4)   |
| Ag1—Ag15 <sup>i</sup>                                                                            | 2.946 (12)  | Ag12—S13              | 2.405 (5)   |
| Ag1—O6                                                                                           | 2.597 (15)  | Ag13—Ag4 <sup>i</sup> | 3.317 (2)   |
| Ag1—S1 <sup>i</sup>                                                                              | 2.512 (12)  | Ag13—Ag14             | 3.070 (2)   |
| Ag1—S2 <sup>i</sup>                                                                              | 2.706 (10)  | Ag13—Ag19             | 3.0290 (19) |
| Ag1—S8                                                                                           | 2.590 (12)  | Ag13—N4               | 2.524 (18)  |
| Ag2—N2                                                                                           | 2.50 (2)    | Ag13—S4               | 2.466 (4)   |
| Ag2—S11                                                                                          | 2.882 (13)  | Ag13—S13              | 2.466 (4)   |
| Ag3—Ag23                                                                                         | 3.022 (2)   | Ag14—Ag4 <sup>i</sup> | 3.173 (2)   |
| Ag3—N1                                                                                           | 2.202 (18)  | Ag14—Ag16             | 2.977 (2)   |
| Ag3—S7                                                                                           | 2.662 (4)   | Ag14—O3 <sup>i</sup>  | 2.500 (10)  |
| Ag3—S8                                                                                           | 2.500 (4)   | Ag14—S2               | 2.454 (4)   |
| Ag3—S16 <sup>i</sup>                                                                             | 2.704 (5)   | Ag14—S4               | 2.486 (5)   |
| Ag4—Ag5                                                                                          | 3.180 (2)   | Ag15—Ag1 <sup>i</sup> | 2.946 (12)  |
| Ag4—Ag13 <sup>i</sup>                                                                            | 3.317 (2)   | Ag15—Ag16             | 3.086 (2)   |
| Ag4—Ag14 <sup>i</sup>                                                                            | 3.173 (2)   | Ag15—P3               | 2.373 (6)   |
| Ag4—O6                                                                                           | 2.454 (10)  | Ag15—S1               | 2.511 (6)   |
| Ag4—S2 <sup>i</sup>                                                                              | 2.533 (4)   | Ag15—S2               | 2.949 (4)   |
| Ag4—S8                                                                                           | 2.923 (4)   | Ag15—S10 <sup>i</sup> | 2.612 (4)   |
| Ag4—S13 <sup>i</sup>                                                                             | 2.479 (4)   | Ag16—P4               | 2.419 (6)   |
| Ag5—O8                                                                                           | 2.511 (10)  | Ag16—S2               | 2.824 (4)   |
| Ag5—S8                                                                                           | 2.442 (4)   | Ag16—S3               | 2.667 (4)   |
| Ag5—S9                                                                                           | 2.477 (4)   | Ag16—S10 <sup>i</sup> | 2.573 (5)   |
| Ag6—Ag7                                                                                          | 3.040 (2)   | Ag17—Ag18             | 3.0167 (19) |
| Ag6—O6                                                                                           | 2.461 (11)  | Ag17—S3               | 2.470 (4)   |
| Ag6—O10 <sup>i</sup>                                                                             | 2.213 (8)   | Ag17—S14 <sup>i</sup> | 2.505 (5)   |
| Ag6—S10                                                                                          | 2.395 (4)   | Ag17—S15 <sup>i</sup> | 2.529 (4)   |
| Ag7—Ag21                                                                                         | 2.910 (2)   | Ag18—O10              | 2.533 (9)   |
| Ag7—S11                                                                                          | 2.437 (5)   | Ag18—S3               | 2.489 (4)   |
| Ag7—S14                                                                                          | 2.390 (4)   | Ag18—S5               | 2.426 (4)   |
| Ag8—Ag9                                                                                          | 3.0549 (19) | Ag19—O2 <sup>i</sup>  | 2.525 (10)  |
| Ag8—Ag12                                                                                         | 2.943 (2)   | Ag19—S4               | 2.507 (5)   |
| Ag8—S9 <sup>i</sup>                                                                              | 2.477 (4)   | Ag19—S5               | 2.635 (4)   |
| Ag8—S12                                                                                          | 2.728 (4)   | Ag19—S6               | 2.441 (5)   |
| Ag8—S14                                                                                          | 2.495 (4)   | Ag20—Ag21             | 2.8836 (19) |
| Ag9—Ag10                                                                                         | 2.980 (2)   | Ag20—N3               | 2.323 (18)  |
| Ag9—P1                                                                                           | 2.401 (4)   | Ag20—S6               | 2.431 (4)   |
| Ag9—S9 <sup>i</sup>                                                                              | 2.703 (4)   | Ag20—S12              | 2.467 (4)   |
| Ag9—S15                                                                                          | 2.446 (4)   | Ag21—Ag22             | 3.3224 (19) |
| Ag10—Ag11                                                                                        | 3.132 (2)   | Ag21—O2 <sup>i</sup>  | 2.538 (9)   |
| Ag10—P2                                                                                          | 2.454 (5)   | Ag21—O9 <sup>i</sup>  | 2.281 (9)   |

|                                       |             |                                         |            |
|---------------------------------------|-------------|-----------------------------------------|------------|
| Ag10—S9 <sup>i</sup>                  | 2.723 (4)   | Ag21—O11                                | 2.353 (9)  |
| Ag10—S16                              | 2.485 (5)   | Ag21—S11                                | 2.542 (4)  |
| Ag11—Ag23 <sup>i</sup>                | 2.939 (2)   | Ag22—Ag23                               | 3.015 (2)  |
| Ag11—O8 <sup>i</sup>                  | 2.422 (10)  | Ag22—O11                                | 2.434 (9)  |
| Ag11—S5 <sup>i</sup>                  | 2.736 (4)   | Ag22—S6                                 | 2.405 (4)  |
| Ag11—S15                              | 2.503 (5)   | Ag22—S7                                 | 2.434 (4)  |
| Ag11—S16                              | 2.523 (4)   | Ag23—O7                                 | 2.388 (10) |
| Ag12—Ag13                             | 3.262 (2)   | Ag23—S5                                 | 2.494 (4)  |
| Ag12—Ag20                             | 3.0367 (19) | Ag23—S7                                 | 2.511 (5)  |
| Ag12—Ag21                             | 3.3155 (18) | Ag23—S16 <sup>i</sup>                   | 2.921 (4)  |
| Ag12—O9 <sup>i</sup>                  | 2.543 (9)   |                                         |            |
| O6—Ag1—S2 <sup>i</sup>                | 79.8(4)     | S13—Ag12—S12                            | 162.55(14) |
| S1 <sup>i</sup> —Ag1—O6               | 115.0(5)    | S4—Ag13—N4                              | 102.4(5)   |
| S1 <sup>i</sup> —Ag1—S2 <sup>i</sup>  | 116.5(5)    | S4—Ag13—S13                             | 157.32(16) |
| S1 <sup>i</sup> —Ag1—S8               | 128.4(4)    | S13—Ag13—N4                             | 93.9(5)    |
| S8—Ag1—O6                             | 91.7(5)     | S2—Ag14—O3 <sup>i</sup>                 | 110.6(2)   |
| S8—Ag1—S2 <sup>i</sup>                | 111.0(4)    | S2—Ag14—S4                              | 150.07(15) |
| N2—Ag2—S11                            | 84.3(5)     | S4—Ag14—O3 <sup>i</sup>                 | 82.1(2)    |
| S1 <sup>i</sup> —Ag2—N2               | 127.1(8)    | P3—Ag15—S1                              | 135.80(18) |
| S1 <sup>i</sup> —Ag2—S11              | 138.8(6)    | P3—Ag15—S2                              | 104.19(16) |
| N1—Ag3—S7                             | 91.0(5)     | P3—Ag15—S10 <sup>i</sup>                | 129.10(17) |
| N1—Ag3—S8                             | 132.6(5)    | S1—Ag15—S2                              | 108.47(15) |
| N1—Ag3—S16 <sup>i</sup>               | 103.3(6)    | S1—Ag15—S10 <sup>i</sup>                | 84.90(15)  |
| S7—Ag3—S16 <sup>i</sup>               | 107.38(15)  | S10 <sup>i</sup> —Ag15—S2               | 81.94(12)  |
| S8—Ag3—S7                             | 125.13(14)  | P4—Ag16—S2                              | 104.68(15) |
| S8—Ag3—S16 <sup>i</sup>               | 94.45(14)   | P4—Ag16—S3                              | 117.47(16) |
| O6—Ag4—S2 <sup>i</sup>                | 86.1(3)     | P4—Ag16—S10 <sup>i</sup>                | 134.34(17) |
| O6—Ag4—S8                             | 87.1(2)     | S3—Ag16—S2                              | 112.11(13) |
| O6—Ag4—S13 <sup>i</sup>               | 136.6(3)    | S10 <sup>i</sup> —Ag16—S2               | 85.13(13)  |
| S2 <sup>i</sup> —Ag4—Ag1              | 60.7(2)     | S10 <sup>i</sup> —Ag16—S3               | 98.25(13)  |
| S2 <sup>i</sup> —Ag4—S8               | 106.08(13)  | S3—Ag17—S14 <sup>i</sup>                | 137.66(14) |
| S13 <sup>i</sup> —Ag4—S2 <sup>i</sup> | 130.84(15)  | S3—Ag17—S15 <sup>i</sup>                | 123.09(15) |
| S13 <sup>i</sup> —Ag4—S8              | 100.21(13)  | S14 <sup>i</sup> —Ag17—S15 <sup>i</sup> | 98.72(14)  |
| S8—Ag5—O8                             | 134.6(2)    | S3—Ag18—O10                             | 85.4(2)    |
| S8—Ag5—S9                             | 143.69(13)  | S5—Ag18—O10                             | 114.6(2)   |
| S9—Ag5—O8                             | 73.3(2)     | S5—Ag18—S3                              | 157.76(15) |
| O10 <sup>i</sup> —Ag6—O6              | 114.1(3)    | O2 <sup>i</sup> —Ag19—S5                | 108.5(2)   |
| O10 <sup>i</sup> —Ag6—S10             | 148.0(3)    | S4—Ag19—O2 <sup>i</sup>                 | 102.5(2)   |
| S10—Ag6—O6                            | 97.5(3)     | S4—Ag19—S5                              | 99.72(14)  |
| S14—Ag7—S11                           | 160.43(16)  | S6—Ag19—O2 <sup>i</sup>                 | 86.9(2)    |
| S9 <sup>i</sup> —Ag8—S12              | 125.31(14)  | S6—Ag19—S4                              | 136.27(15) |
| S9 <sup>i</sup> —Ag8—S14              | 136.33(15)  | S6—Ag19—S5                              | 117.81(14) |
| S14—Ag8—S12                           | 98.36(14)   | N3—Ag20—S6                              | 102.4(5)   |



|                                       |            |                          |            |
|---------------------------------------|------------|--------------------------|------------|
| P1—Ag9—S9 <sup>i</sup>                | 106.42(15) | N3—Ag20—S12              | 104.0(5)   |
| P1—Ag9—S15                            | 144.96(17) | S6—Ag20—S12              | 153.25(14) |
| S15—Ag9—S9 <sup>i</sup>               | 105.64(14) | O11—Ag21—O2 <sup>i</sup> | 72.5(3)    |
| P2—Ag10—S9 <sup>i</sup>               | 108.75(15) | O11—Ag21—S11             | 83.3(2)    |
| P2—Ag10—S16                           | 134.74(15) | O11—Ag22—S7              | 96.9(2)    |
| S16—Ag10—S9 <sup>i</sup>              | 114.87(13) | S6—Ag22—O11              | 101.6(2)   |
| O8 <sup>i</sup> —Ag11—S5 <sup>i</sup> | 97.9(2)    | S6—Ag22—S7               | 155.64(16) |
| O8 <sup>i</sup> —Ag11—S15             | 89.0(3)    | O7—Ag23—S5               | 105.0(3)   |
| O8 <sup>i</sup> —Ag11—S16             | 108.3(3)   | O7—Ag23—S7               | 97.1(3)    |
| S15—Ag11—S5 <sup>i</sup>              | 111.39(14) | O7—Ag23—S16 <sup>i</sup> | 85.3(2)    |
| S15—Ag11—S16                          | 130.11(15) | S5—Ag23—S7               | 142.10(15) |
| S16—Ag11—S5 <sup>i</sup>              | 111.88(14) | S5—Ag23—S16 <sup>i</sup> | 106.91(14) |
| S13—Ag12—O9 <sup>i</sup>              | 107.7(2)   | S7—Ag23—S16 <sup>i</sup> | 105.23(13) |
| Symmetry code: (i) $-x, -y, -z+1$ .   |            |                          |            |

**Figure S1. The superimposed picture of Ag<sub>24</sub> cores in 2-5.**

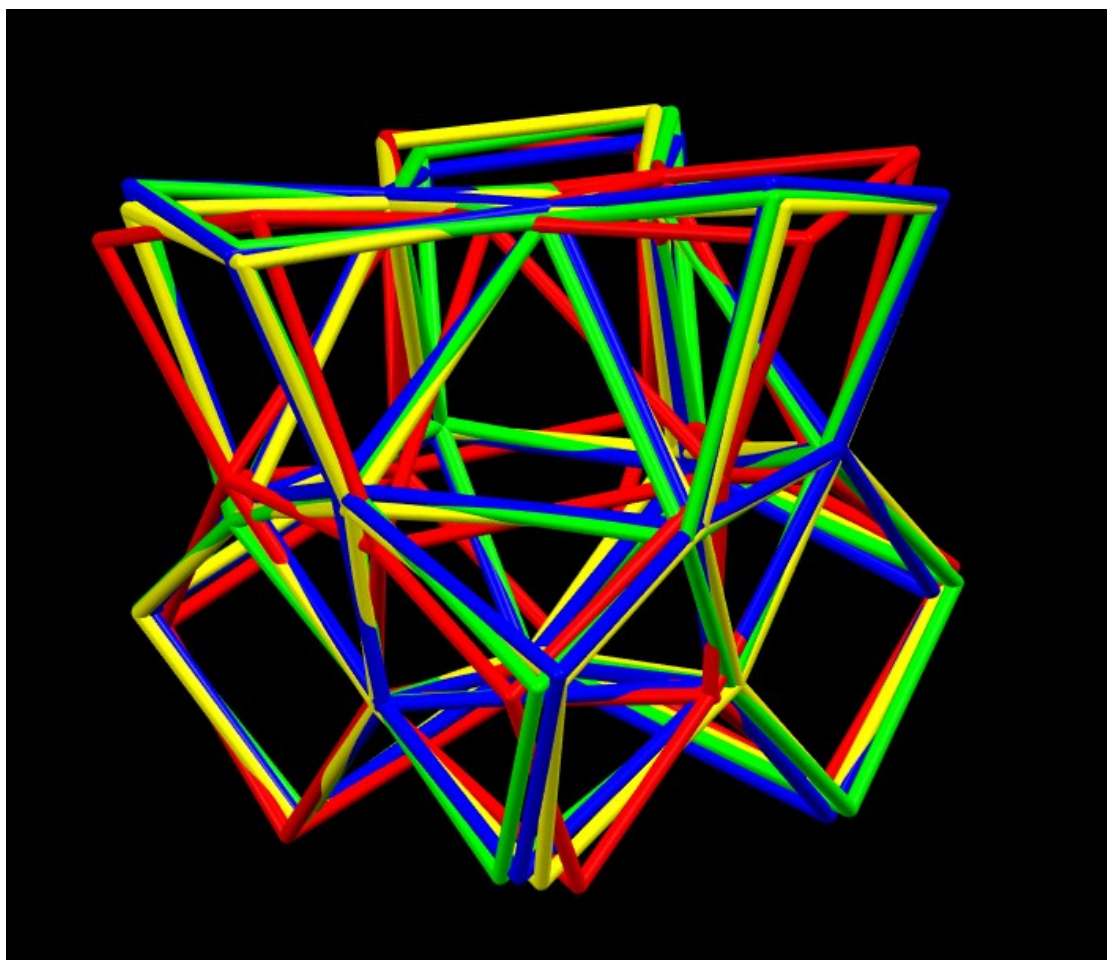

Figure S2. The simulated and experimental isotopic distribution patterns of 6a-6e.

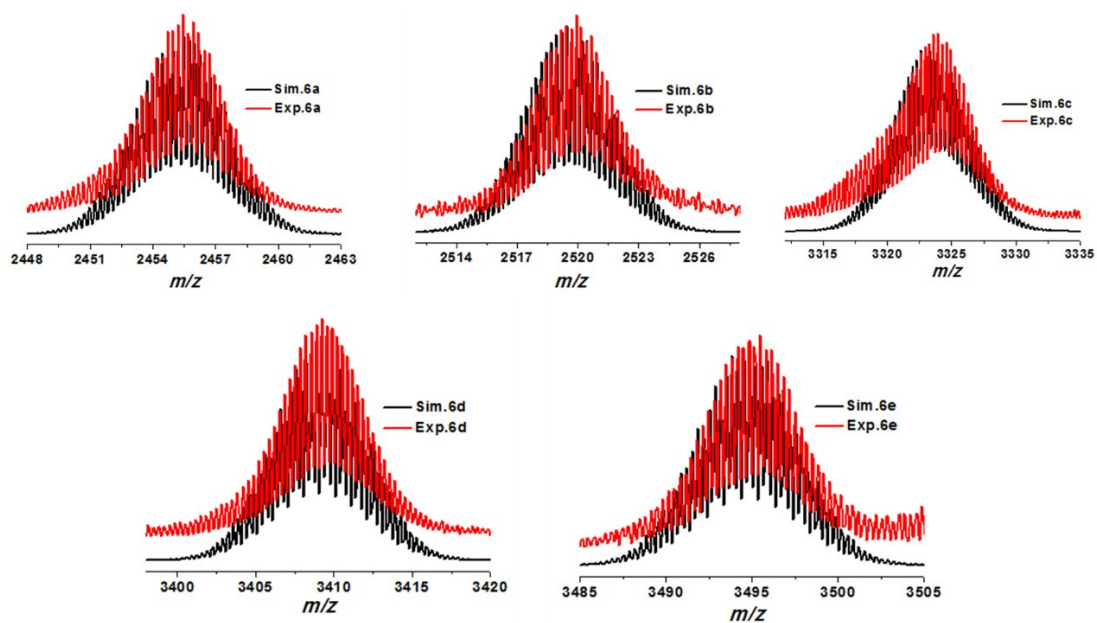

**Figure S3. Diffuse reflectance UV-visible spectrum of 1 at room temperature.**

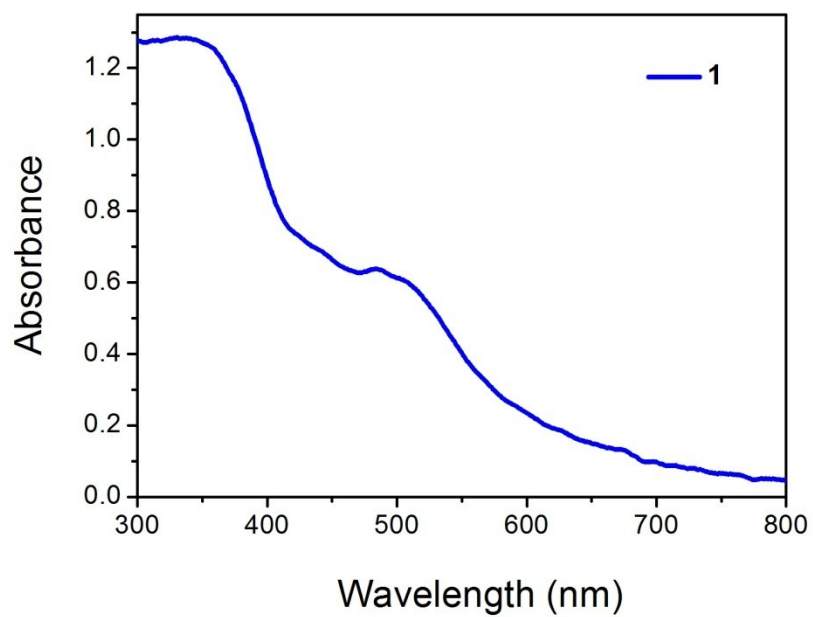

**Figure S4. Excitation spectrum of 1 at room temperature.**

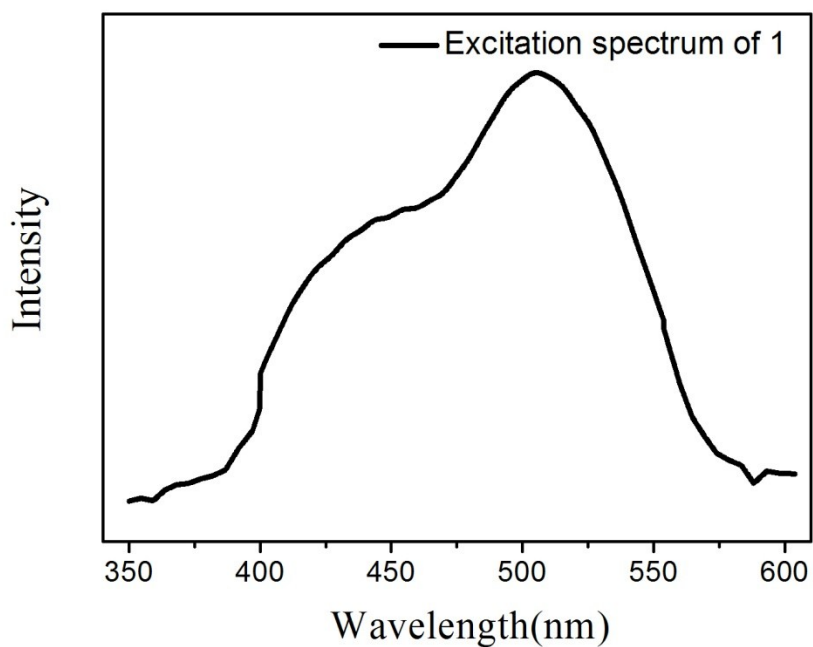

Figure S5. The cluster structure and molecule packing in 2-4.

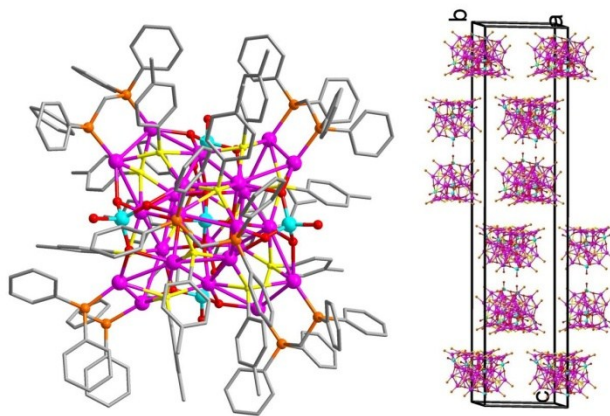

2

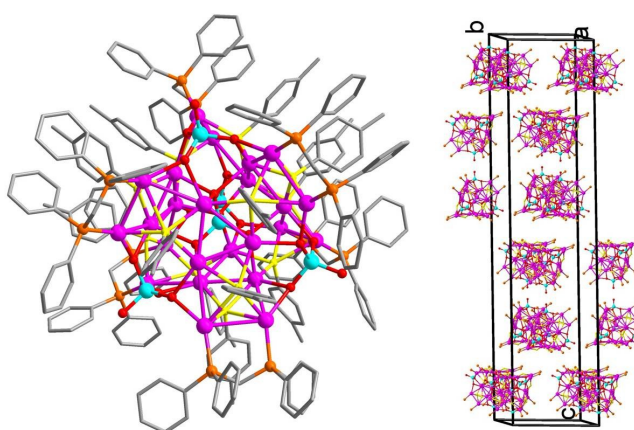

3

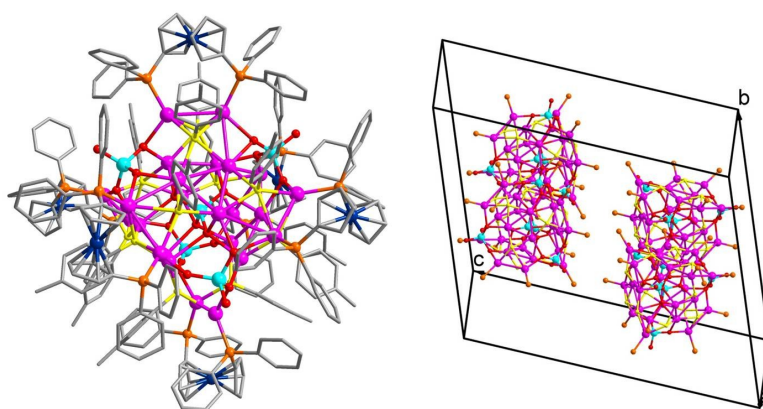

4

## References:

- 1 X. Liu, H. Yang, N. Zheng and L. Zheng, *Eur. J. Inorg. Chem.* 2010, 2084.
- 2 Bruker APEX2; Bruker AXS, Inc.: Madison, WI, 2010.
- 3 Bruker SAINT, *Data Reduction Software*; Bruker AXS, Inc.: Madison, WI, 2009.
- 4 G. M. Sheldrick, *SADABS, Program for Empirical Absorption Correction*; University of Gottingen: Gottingen, Germany, 2008.
- 5 (a) G. M. Sheldrick, *SHELXL-97, Program for the Refinement of Crystal*; University of Gottingen: Gottingen, Germany, 1997. (b) G. M. Sheldrick, *Acta Crystallogr.* 1990, **A46**, 467. (c) G. M. Sheldrick, *Acta Crystallogr.* 2008, **A64**, 112.
- 6 A. L. Spek, *Implemented as the PLATON Procedure, a Multipurpose Crystallographic Tool*, Utrecht University, Utrecht, The Netherlands, 1998.
- 7 X.-Y. Li, Y.-Z. Tan, K. Yu, X.-P. Wang, Y.-Q. Zhao, D. Sun, L.-S. Zheng, *Chem-Asian J.*, **2015**, *10*, 1295.
- 8 G. G. Gao, P. S. Cheng, T. C. W. Mak, *J. Am. Chem. Soc.* **2009**, *131*, 18257.
- 9 J. Qiao, K. Shi, Q.-M. Wang, *Angew. Chem. Int. Ed.* **2010**, *49*, 1765.
